# Supplementary material for: Interplay Of Serum Bilirubin and Tobacco Smoking with Lung and Head and Neck Cancers in a Diverse, EHR-linked Los Angeles Biobank
Source: bioRxiv or medRxiv preprint supplement (doi:10.1101/2023.09.29.23296364), 2023-10-03
Supplement: Supplementary file [file media-1.pdf]

## Supplementary Tables and Figures

**Supplementary Figure 1: Directed acyclic graph representing the associations between tobacco smoking and serum total bilirubin with dotted lines representing the associations evaluated in this study**

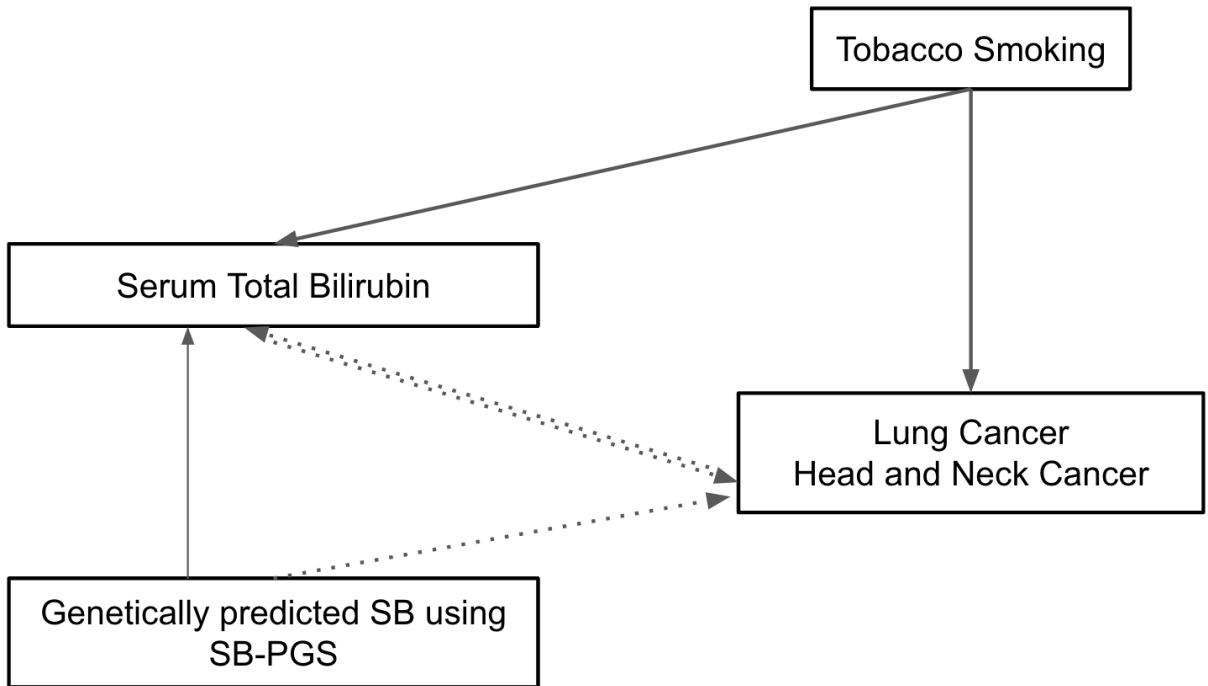

Supplementary Figure 2: Flowchart of participant inclusion and exclusion

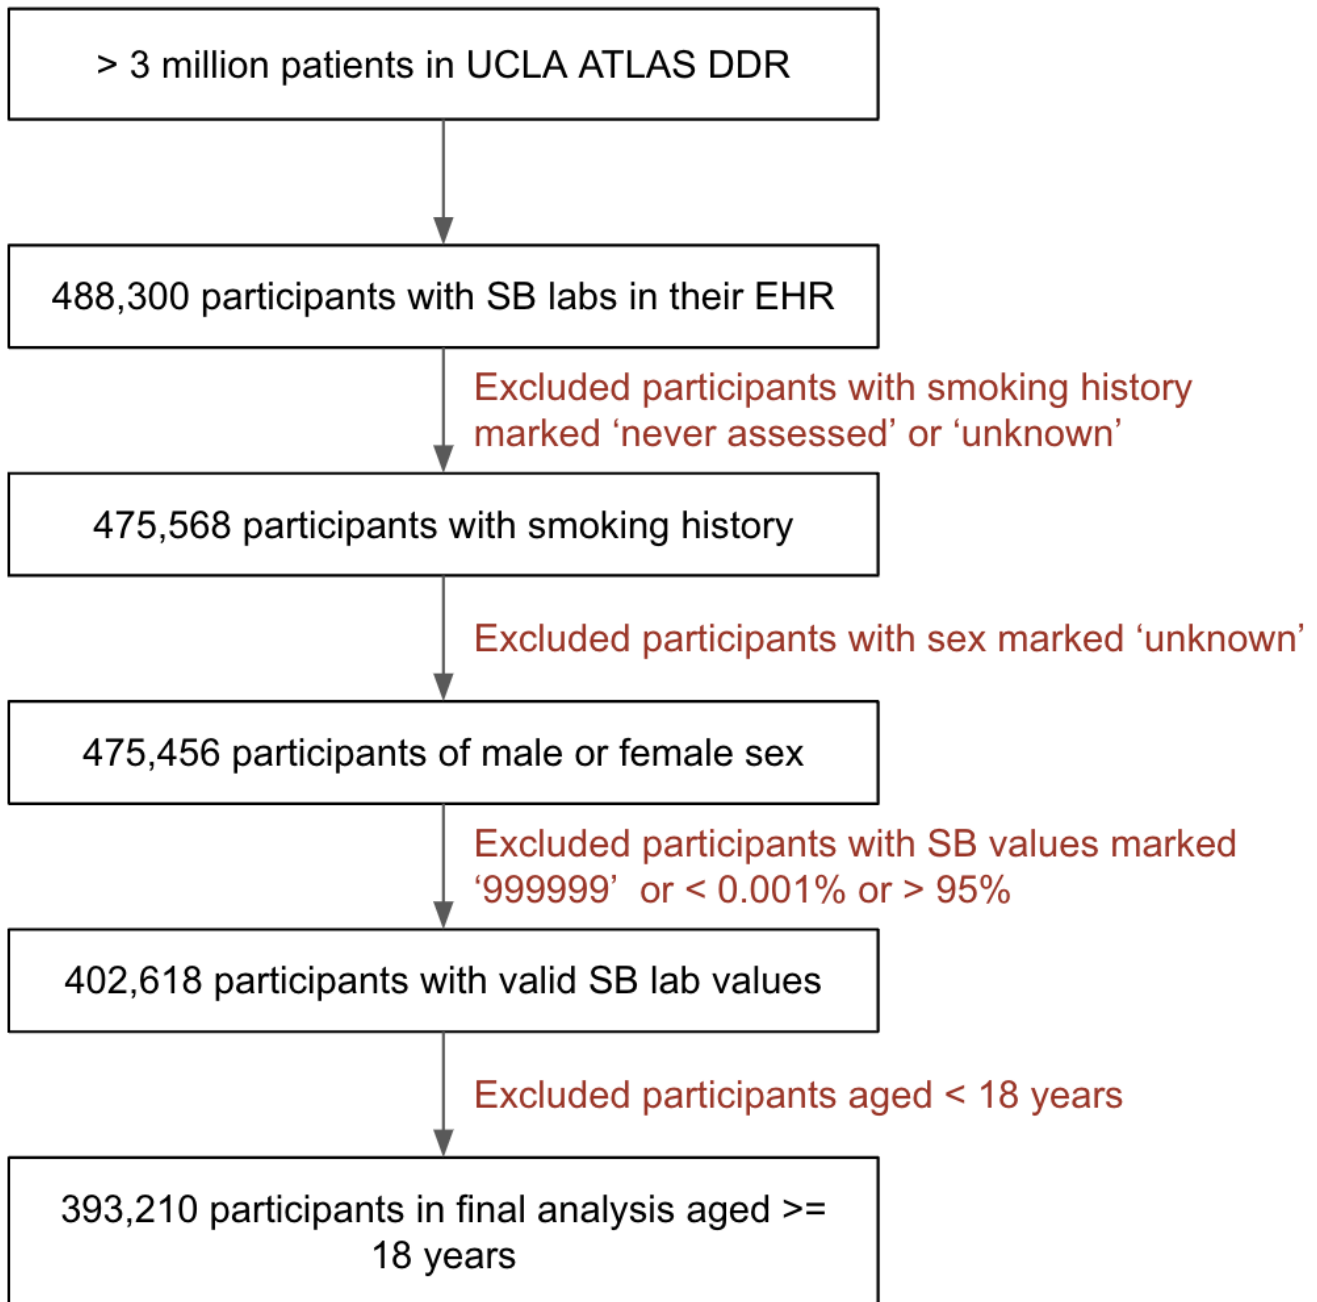

**Supplementary Table 1: ICD Codes for Head and Neck Cancer and Lung Cancer**

| Type of Cancer       | ICD Codes                                                                                                                                                                                                                                                                                                                                                                                                                                                                                                                                                                                                                                                                                                                                                                                                                                                                                                                                                                                                                                                                                                                                                                                                                                                              |
|----------------------|------------------------------------------------------------------------------------------------------------------------------------------------------------------------------------------------------------------------------------------------------------------------------------------------------------------------------------------------------------------------------------------------------------------------------------------------------------------------------------------------------------------------------------------------------------------------------------------------------------------------------------------------------------------------------------------------------------------------------------------------------------------------------------------------------------------------------------------------------------------------------------------------------------------------------------------------------------------------------------------------------------------------------------------------------------------------------------------------------------------------------------------------------------------------------------------------------------------------------------------------------------------------|
| Head and Neck Cancer | '140', '140.1', '140.3', '140.4', '140.5', '140.6',<br>'140.8', '140.9', '141', '141.1', '141.2', '141.3',<br>'141.4', '141.5', '141.6', '141.8', '141.9', '142',<br>'142.1', '142.2', '142.8', '142.9', '143', '143.1',<br>'143.8', '143.9', '144', '144.1', '144.8', '144.9',<br>'145', '145.1', '145.2', '145.3', '145.4', '145.5',<br>'145.6', '145.8', '145.9', '146', '146.1', '146.2',<br>'146.3', '146.4', '146.5', '146.6', '146.7', '146.8',<br>'146.9', '147', '147.1', '147.2', '147.3', '147.8',<br>'147.9', '148', '148.1', '148.2', '148.3', '148.8',<br>'148.9', '149', '149.1', '149.8', '149.9', '160',<br>'160.1', '160.2', '160.3', '160.4', '160.5', '160.8',<br>'160.9', '161', '161.1', '161.2', '161.3', '161.8',<br>'161.9', 'C00.0', 'C00.1', 'C00.2', 'C00.3', 'C00.4',<br>'C00.5', 'C00.6', 'C00.8', 'C00.9', 'C02.0', 'C02.1',<br>'C02.2', 'C02.3', 'C02.4', 'C02.8', 'C02.9', 'C06.0',<br>'C06.1', 'C06.2', 'C06.8', 'C06.80', 'C06.89',<br>'C06.9', 'C08.0', 'C08.1', 'C08.9', 'C09.0', 'C09.1',<br>'C09.8', 'C09.9', 'C10.0', 'C10.1', 'C10.2', 'C10.3',<br>'C10.4', 'C10.8', 'C10.9', 'C11.0', 'C11.1', 'C11.2',<br>'C11.3', 'C11.8', 'C11.9', 'C13.0', 'C13.1', 'C13.2',<br>'C13.8', 'C13.9', 'C14.0', 'C14.2', 'C14.8',<br>'C30.0'. |

|             |                                                                                                                           |
|-------------|---------------------------------------------------------------------------------------------------------------------------|
| Lung Cancer | 'C34.0', 'C34.1', 'C34.2', 'C34.3', 'C34.8',<br>'C34.9', '162.0', '162.2', '162.3', '162.4', '162.5',<br>'162.8', '162.9' |
|-------------|---------------------------------------------------------------------------------------------------------------------------|

**Supplementary Table 2: Baseline characteristics of participants, stratified by case: control status**

|                           |                                           | <b>Cancer Controls</b> | <b>LC Cases</b> | <b>HNC Cases</b> |
|---------------------------|-------------------------------------------|------------------------|-----------------|------------------|
| n                         |                                           | 388793                 | 2378            | 2039             |
| Patient Age, mean (SD)    |                                           | 57.0 (18.7)            | 75.8 (10.9)     | 69.7 (13.5)      |
| SB mg/dL, mean (SD)       |                                           | 0.6 (0.3)              | 0.5 (0.2)       | 0.5 (0.2)        |
| Sex, n (%)                | Female                                    | 213979 (55.0)          | 1259 (52.9)     | 589 (28.9)       |
|                           | Male                                      | 174814 (45.0)          | 1119 (47.1)     | 1450 (71.1)      |
| Smoking History, n (%)    | Never Smokers                             | 270277 (69.6)          | 831 (34.9)      | 1010 (49.5)      |
|                           | Ever Smokers                              | 118516 (30.4)          | 1547 (65.1)     | 1029 (50.5)      |
| Self-reported Race, n (%) | American Indian or Alaska Native          | 2045 (0.7)             | 10 (0.5)        | 6 (0.4)          |
|                           | Asian                                     | 36632 (13.4)           | 395 (19.6)      | 208 (12.8)       |
|                           | Black or African American                 | 15860 (5.8)            | 111 (5.5)       | 59 (3.6)         |
|                           | Native Hawaiian or Other Pacific Islander | 530 (0.2)              | 9 (0.4)         | 2 (0.1)          |

|                                      |                       |               |             |             |
|--------------------------------------|-----------------------|---------------|-------------|-------------|
|                                      | Other Race            | 32185 (11.8)  | 203 (10.1)  | 171 (10.5)  |
|                                      | White or Caucasian    | 161596 (59.1) | 1111 (55.2) | 1078 (66.2) |
| Self-Reported<br>Ethnicity, n<br>(%) | Hispanic or Latin     | 33631 (14.3)  | 136 (7.0)   | 129 (9.0)   |
|                                      | Not Hispanic or Latin | 211951 (82.2) | 1681 (88.3) | 1380 (87.9) |

### **Supplementary Table 3: Effects of HNC and LC on SB**

Results of linear regressions adjusted for age, sex, SIRE to evaluate the associations between HNC/LC and SB levels(dependent variable).

| Variables                  | Effect on SB |              |          |
|----------------------------|--------------|--------------|----------|
|                            | mg/dL        | 95% CI       | P-Value  |
| HNC                        | -0.11        | -0.13, -0.09 | < 0.0001 |
| HNC (adjusted for smoking) | -0.11        | -0.13, -0.09 | < 0.0001 |
| LC                         | -0.09        | -0.1, -0.07  | < 0.0001 |
| LC (adjusted for smoking)  | -0.08        | -0.1, -0.07  | < 0.0001 |

### **Supplementary Table 4a: Propensity matched group baseline characteristics stratified by HNC**

|                                |        | Overall       | HNC Controls  | HNC Cases     |
|--------------------------------|--------|---------------|---------------|---------------|
| n                              |        | 4074          | 2037          | 2037          |
| Patient Age, mean (SD)         |        | 69.7 (13.5)   | 69.7 (13.5)   | 69.7 (13.5)   |
| Serum Total Bilirubin, [Q1,Q3] |        | 0.5 [0.4,0.7] | 0.6 [0.4,0.8] | 0.5 [0.4,0.6] |
| Sex, n (%)                     | Female | 1174 (28.8)   | 587 (28.8)    | 587 (28.8)    |
|                                | Male   | 2900 (71.2)   | 1450 (71.2)   | 1450 (71.2)   |

|                                |                                           |             |             |             |
|--------------------------------|-------------------------------------------|-------------|-------------|-------------|
| Smoking History, n (%)         | 0                                         | 2018 (49.5) | 1009 (49.5) | 1009 (49.5) |
|                                | 1                                         | 2056 (50.5) | 1028 (50.5) | 1028 (50.5) |
| Self-reported Race, n (%)      | American Indian or Alaska Native          | 11 (0.3)    | 6 (0.4)     | 5 (0.3)     |
|                                | Asian                                     | 414 (12.7)  | 207 (12.7)  | 207 (12.7)  |
|                                | Black or African American                 | 118 (3.6)   | 59 (3.6)    | 59 (3.6)    |
|                                | Native Hawaiian or Other Pacific Islander | 4 (0.1)     | 2 (0.1)     | 2 (0.1)     |
|                                | Other Race                                | 342 (10.5)  | 171 (10.5)  | 171 (10.5)  |
|                                | Unknown Race                              | 210 (6.5)   | 105 (6.4)   | 105 (6.5)   |
|                                | White or Caucasian                        | 2156 (66.2) | 1078 (66.2) | 1078 (66.3) |
| Self Reported Ethnicity, n (%) | Hispanic or Latin                         | 343 (9.1)   | 173 (9.2)   | 170 (9.0)   |
|                                | Not Hispanic or Latin                     | 3310 (87.9) | 1655 (87.8) | 1655 (88.0) |
|                                | Unknown Ethnicity                         | 112 (3.0)   | 56 (3.0)    | 56 (3.0)    |

**Supplementary Table 4b: Propensity matched group baseline characteristics stratified by LC**

|                                |        | Overall       | Lung Cancer Controls | Lung Cancer Cases |
|--------------------------------|--------|---------------|----------------------|-------------------|
| n                              |        | 4746          | 2373                 | 2373              |
| Patient Age, mean (SD)         |        | 75.8 (10.9)   | 75.8 (10.9)          | 75.8 (10.9)       |
| Serum Total Bilirubin, [Q1,Q3] |        | 0.5 [0.4,0.7] | 0.5 [0.4,0.7]        | 0.5 [0.4,0.7]     |
| Sex, n (%)                     | Female | 2512 (52.9)   | 1256 (52.9)          | 1256 (52.9)       |
|                                | Male   | 2234 (47.1)   | 1117 (47.1)          | 1117 (47.1)       |

|                                |                                           |             |             |             |
|--------------------------------|-------------------------------------------|-------------|-------------|-------------|
| Smoking History, n (%)         | Never Smokers                             | 1656 (34.9) | 828 (34.9)  | 828 (34.9)  |
|                                | Ever Smokers                              | 3090 (65.1) | 1545 (65.1) | 1545 (65.1) |
| Self Reported Race, n (%)      | American Indian or Alaska Native          | 15 (0.4)    | 5 (0.2)     | 10 (0.5)    |
|                                | Asian                                     | 786 (19.6)  | 393 (19.6)  | 393 (19.6)  |
|                                | Black or African American                 | 222 (5.5)   | 111 (5.5)   | 111 (5.5)   |
|                                | Native Hawaiian or Other Pacific Islander | 12 (0.3)    | 6 (0.3)     | 6 (0.3)     |
|                                | Other Race                                | 406 (10.1)  | 203 (10.1)  | 203 (10.1)  |
|                                | Unknown Race                              | 348 (8.7)   | 174 (8.7)   | 174 (8.7)   |
|                                | White or Caucasian                        | 2222 (55.4) | 1111 (55.5) | 1111 (55.3) |
| Self Reported Ethnicity, n (%) | Hispanic or Latin                         | 326 (7.3)   | 171 (7.7)   | 155 (7.0)   |
|                                | Not Hispanic or Latin                     | 3918 (88.1) | 1959 (87.8) | 1959 (88.4) |
|                                | Unknown Ethnicity                         | 202 (4.5)   | 101 (4.5)   | 101 (4.6)   |

**Supplementary Table 5: Baseline characteristics of European GIA UCLA ATLAS Biobank participants included in SB-PGS analysis**

|                        |        | <b>Cancer Controls</b> | <b>LC Cases</b> | <b>HNC Cases</b> |
|------------------------|--------|------------------------|-----------------|------------------|
| n                      |        | 14871                  | 124             | 152              |
| Patient Age, mean (SD) |        | 63.2                   | 73.8            | 70.1             |
| SB mg/dL, mean (SD)    |        | 0.6                    | 0.5             | 0.5              |
| Sex, n (%)             | Female | 7432 (50)              | 63 (50)         | 30 (20)          |

|                           |               |           |         |          |
|---------------------------|---------------|-----------|---------|----------|
|                           | Male          | 7439 (50) | 61 (50) | 122 (80) |
| Smoking<br>History, n (%) | Never Smokers | 9421 (64) | 35 (28) | 82 (54)  |
|                           | Ever Smokers  | 5450 (36) | 89 (72) | 70 (46)  |
